# Supplementary material for: Regional Variations in Heart Failure Quality and Outcomes: Get With The Guidelines–Heart Failure Registry
Source: PubMed Central journal article supplement — J Am Heart Assoc. 2021 Mar 24;10(7):e018696. doi: 10.1161/JAHA.120.018696 (PMC8174327; doi:10.1161/jaha.120.018696), 2021-03-24
Supplement: JAH3-10-e018696-s001.pdf [file JAH3-10-e018696-s001.pdf]

# **SUPPLEMENTAL MATERIAL**

**Table S1. Risk-adjusted Inpatient Mortality by Ejection Fraction.**

| <b>Outcome =<br/>In-hospital<br/>mortality</b> | <b>Adjusted OR (95%<br/>CI) – overall</b> | <b>Adjusted OR (95%<br/>CI) – HFrEF</b> | <b>Adjusted OR<br/>(95% CI) – HFbEF</b> | <b>Adjusted OR<br/>(95% CI) –<br/>HFpEF</b> |
|------------------------------------------------|-------------------------------------------|-----------------------------------------|-----------------------------------------|---------------------------------------------|
| <b>Midwest vs<br/>Northeast</b>                | 0.64 (0.51, 0.80)<br>p=0001               | 0.74 (0.61, 0.90)<br>p=0.003            | 0.86 (0.69, 1.08)<br>p=0.20             | 0.80 (0.67, 0.97)<br>p=0.02                 |
| <b>South vs<br/>Northeast</b>                  | 0.87 (0.70, 1.09)<br>p=0.23               | 0.95 (0.77, 1.16)<br>p=0.61             | 1.07 (0.84, 1.35)<br>p=0.60             | 1.02 (0.83, 1.25)<br>p=0.87                 |
| <b>West vs<br/>Northeast</b>                   | 0.96 (0.78, 1.20)<br>p=0.74               | 1.05 (0.87, 1.27)<br>p=0.62             | 1.11 (0.86, 1.42)<br>P=0.42             | 0.93 (0.75, 1.15)<br>p=0.50                 |

HFrEF= heart failure with reduced ejection fraction; HFbEF= heart failure with borderline ejection fraction; HFpEF= heart failure with reserved ejection fraction

**Table S2. Risk-adjusted Length of Stay by Ejection Fraction.**

| <b>Outcome = LOS (&gt; 4 d vs ≤ 4 d)</b> | <b>Adjusted odds ratio (95% CI) – overall</b> | <b>Adjusted odds ratio (95% CI) – HFrEF</b> | <b>Adjusted odds ratio (95% CI) – HFbEF</b> | <b>Adjusted odds ratio (95% CI) – HFpEF</b> |
|------------------------------------------|-----------------------------------------------|---------------------------------------------|---------------------------------------------|---------------------------------------------|
| <b>Midwest vs Northeast</b>              | 0.70 (0.63, 0.78)<br>p<0.00001                | 0.70 (0.63, 0.79)<br>p<0.0001               | 0.69 (0.60, 0.79)<br>p<0.0001               | 0.73 (0.65, 0.82)<br>p<0.0001               |
| <b>South vs Northeast</b>                | 0.85 (0.76, 0.95)<br>p=0.005                  | 0.87 (0.78, 0.98)<br>p=0.023                | 0.88 (0.77, 1.00)<br>p=0.053                | 0.88 (0.78, 0.99)<br>p=0.03                 |
| <b>West vs Northeast</b>                 | 0.72 (0.63, 0.82)<br>p<0.0001                 | 0.75 (0.65, 0.87)<br>p=0.0002               | 0.69 (0.59, 0.80)<br>p<0.0001               | 0.70 (0.61, 0.81)<br>p<0.0001               |

HFrEF= heart failure with reduced ejection fraction; HFbEF= heart failure with borderline ejection fraction; HFpEF= heart failure with reserved ejection fraction

**Table S3. Baseline SES characteristics by region in the Medicare Fee for Service Subgroup.**

|                                              | <b>Overall<br/>(N=98808)</b> | <b>Northeast<br/>(N=31345)</b> | <b>Midwest<br/>(N=25606)</b> | <b>South<br/>(N=31242)</b> | <b>West<br/>(N=10615)</b> | <b>MW<br/>vs. NE<br/>(%)</b> | <b>S vs.<br/>NE<br/>(%)</b> | <b>W vs.<br/>NE<br/>(%)</b> |
|----------------------------------------------|------------------------------|--------------------------------|------------------------------|----------------------------|---------------------------|------------------------------|-----------------------------|-----------------------------|
| <b>High School Graduate<br/>(percentage)</b> |                              |                                |                              |                            |                           |                              |                             |                             |
| Median (Q1, Q3)                              | 88.9<br>(85.5,90.8)          | 89.7<br>(87.4,91.2)            | 90.0<br>(87.3,92.1)          | 87.3<br>(82.2,90.1)        | 86.9<br>(77.3,91.6)       | 20.44                        | 70.21                       | 64.59                       |
| <b>Median Household<br/>Income</b>           |                              |                                |                              |                            |                           |                              |                             |                             |
| Median (Q1, Q3)                              | 52171<br>(45733,61890)       | 56002<br>(50131,68333)         | 50014<br>(44915,58226)       | 48900<br>(41618,55413)     | 56911<br>(51439,67190)    | 44.01                        | 64.54                       | 5.80                        |

**Table S4. Fee for Service Medicare Subgroup: 30 day outcomes without and with SES variables added as covariates.**

|                                                           | <b>Northeast</b> | <b>Midwest</b>                   | <b>South</b>                    | <b>West</b>                      |
|-----------------------------------------------------------|------------------|----------------------------------|---------------------------------|----------------------------------|
| <b>30-day Mortality (%)</b>                               | 5%               | 4.36%                            | 4.57%                           | 4.09%                            |
| 30 day mortality<br>Unadjusted HR<br>(95% CI)             | 1<br>[reference] | 0.91<br>(0.85, 0.99)<br>p=0.02   | 0.94<br>(0.88, 1.01)<br>p=0.10  | 0.87 (0.79, 0.97)<br>p=0.01      |
| *Adjusted HR<br>(95% CI)                                  | 1<br>[reference] | 1.08<br>(0.95, 1.22)<br>p=0.23   | 1.11<br>(0.99, 1.24)<br>p= 0.07 | 1.02<br>(0.87, 1.19)<br>p= 0.82  |
| **Adjusted HR<br>(95% CI)<br><b>(SES variables added)</b> | 1<br>[reference] | 1.02<br>(0.91, 1.13)<br>p=0.77   | 1.06<br>(0.95, 1.18)<br>p= 0.29 | 1.02<br>(0.87, 1.20)<br>p= 0.78  |
| <b>30-day all cause re-admission (%)</b>                  | 17.06%           | 14.55%                           | 15.67%                          | 13.67%                           |
| Unadjusted HR<br>(95% CI)                                 | 1<br>[reference] | 0.90<br>(0.86, 0.93)<br>p<0.0001 | 0.94<br>(0.90, 0.98)<br>p=0.001 | 0.86<br>(0.81, 0.91)<br>p<0.0001 |
| *Adjusted HR<br>(95% CI)                                  | 1<br>[reference] | 0.92<br>(0.85, 0.99)<br>P=0.03   | 0.93<br>(0.86, 1.01)<br>p=0.08  | 0.90<br>(0.80, 1.00)<br>p=0.05   |
| **Adjusted HR<br>(95% CI)<br><b>(SES variables added)</b> | 1<br>[reference] | 0.93<br>(0.86, 1.00)<br>P=0.06   | 0.91<br>(0.83, 0.99)<br>p=0.04  | 0.87<br>(0.78, 0.97)<br>p=0.01   |

\*Factors for adjustment included: age, sex, race, anemia, ischemic history, CVA/TIA, diabetes, hyperlipidemia, hypertension, COPD/asthma, PVD, renal insufficiency, cigarette smoking in the past year, vital signs and laboratory studies at admission (systolic blood pressure, heart rate, sodium, BUN, LVEF) and hospital characteristics

\*\* Socioeconomic factors (median household income and percentage of people with at least a high school diploma) at the county level added to the multivariable model.
